# Supplementary material
Source: MDPI journal article supplement (https://www.mdpi.com/2073-4441/13/14/1940)
Supplement: s1 [file s1]

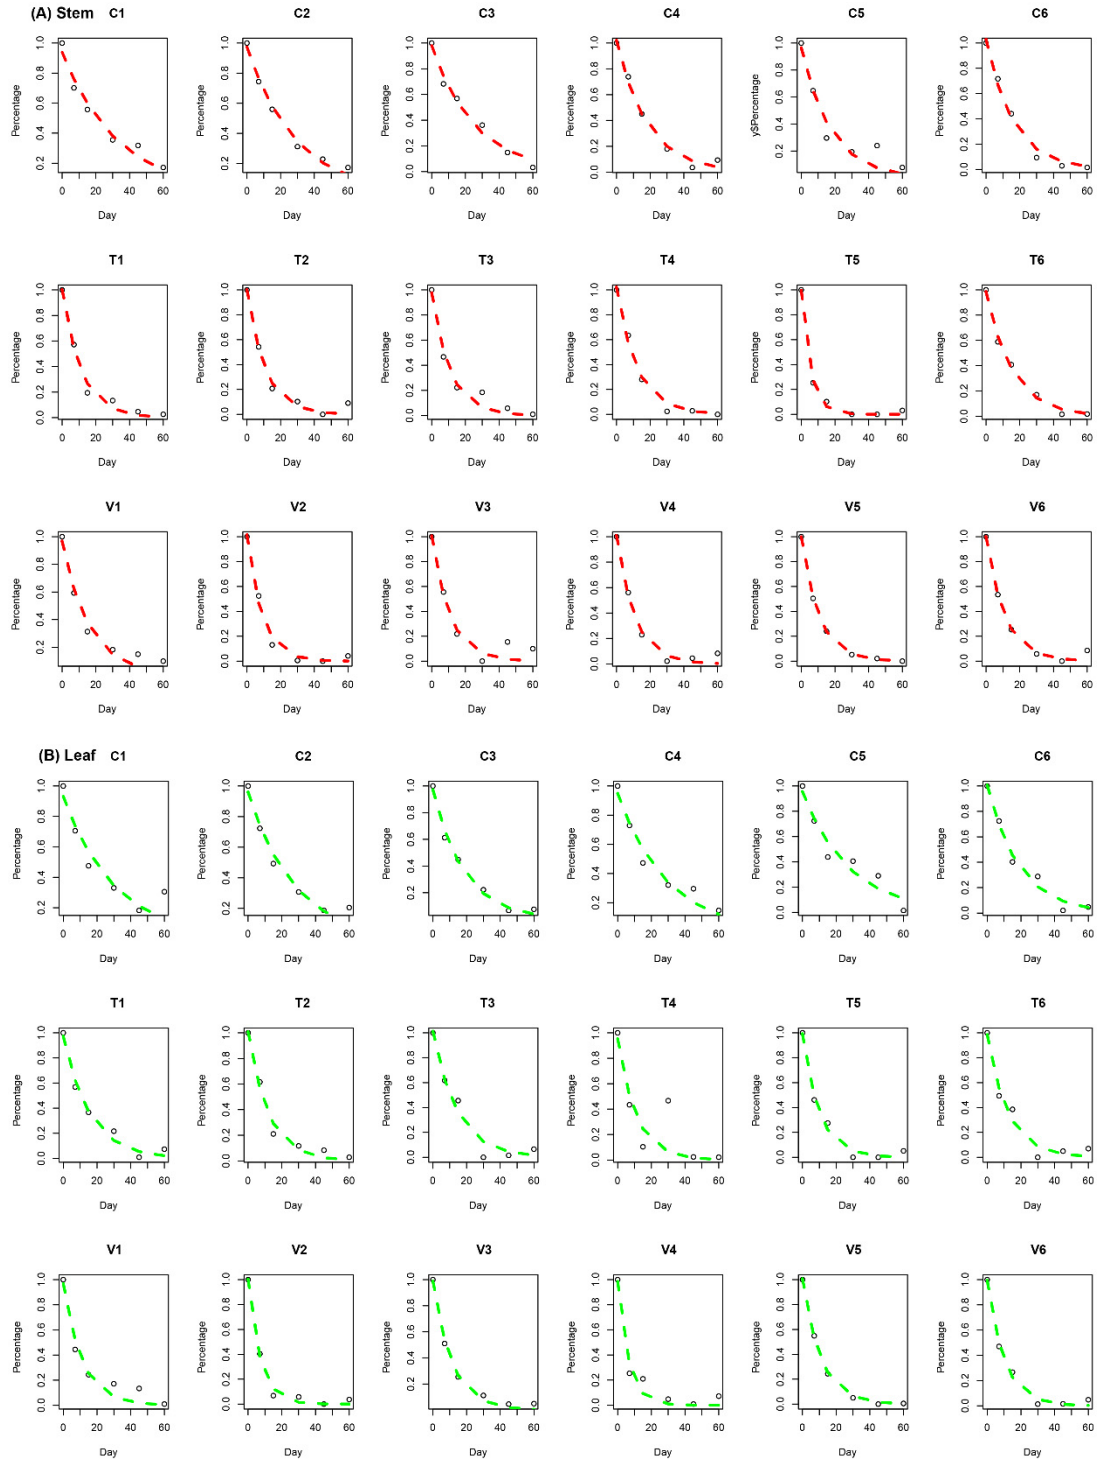

**Figure S1.** The scatterplot of decomposition rates of (A) Stem and (B) Leaf litter in each tank (C, T, V with 6 replicates). The 1.0 on the vertical axis represent 100%.

Table S1 Results from Tukey's post hoc comparing the differences of *k* of different treatments for in stem or leaf litter respectively. \* $p < 0.05$ ; \*\* $p < 0.01$ . C, ambient temperature; T, +4°C constant warming; V, fluctuate warming.

| Contrast | estimate | z      | P          |
|----------|----------|--------|------------|
| CL - TL  | -0.6890  | -4.685 | <0.0001*** |
| CL - VL  | -0.9831  | -6.685 | <0.0001*** |
| CL - CS  | -0.0974  | -0.662 | 0.9860     |
| CL - TS  | -0.8550  | -5.813 | <0.0001*** |
| CL - VS  | -0.8011  | -5.447 | <0.0001*** |
| TL - VL  | -0.2941  | -2.000 | 0.3423     |
| TL - CS  | 0.5916   | 4.023  | 0.0008***  |
| TL - TS  | -0.1660  | -1.129 | 0.8696     |
| TL - VS  | -0.1121  | -0.762 | 0.9738     |
| VL - CS  | -0.8857  | 6.022  | <0.0001*** |
| VL - TS  | 0.1281   | 0.871  | 0.9534     |
| VL - VS  | 0.1820   | 1.238  | 0.8183     |
| CS - TS  | -0.7576  | -5.151 | <0.0001*** |
| CS - VS  | -0.7037  | -4.785 | <0.0001*** |
| TS - VS  | 0.0539   | 0.367  | 0.9991     |

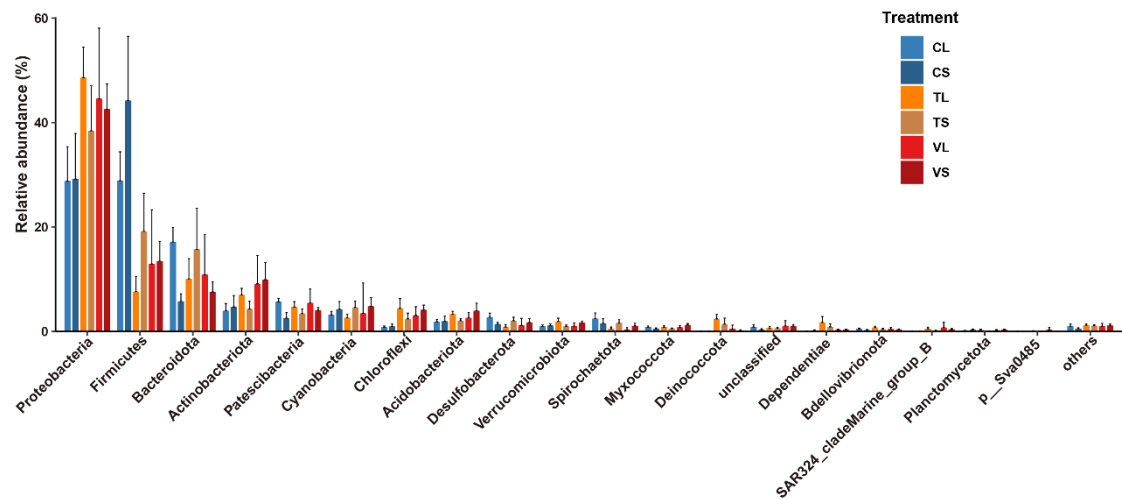

Supplementary Figure S2. Relative abundances of the dominant bacterial phyla (>0.01) under different warming conditions. All data are presented as mean + se

Table S2 Results from GLM comparing the differences of the relative abundance of different treatments for decomposition-related Phylum (>1%) in stem or leaf litter respectively. \* $p < 0.05$ ; \*\* $p < 0.01$ ; \*\*\* $p < 0.001$ . C, ambient temperature; T, +4°C constant warming; V, fluctuate warming.

| Phylum         | Treatment | Estimate | <i>t</i> | <i>P</i> |
|----------------|-----------|----------|----------|----------|
| Proteobacteria | T         | 0.6709   | 1.7462   | 0.0910   |
|                | V         | 0.5818   | 1.5142   | 0.1404   |
|                | Tissue    | -0.1992  | -0.5185  | 0.6079   |
|                | T:Tissue  | -0.1346  | -0.2477  | 0.8061   |
|                | V:Tissue  | 0.1626   | 0.2993   | 0.7668   |
| Firmicutes     | T         | -1.7524  | -2.9936  | 0.0054*  |
|                | V         | -1.0371  | -1.7716  | 0.0866   |
|                | Tissue    | 0.2817   | 0.4811   | 0.6339   |
|                | T:Tissue  | 0.6551   | 0.7913   | 0.4350   |
|                | V:Tissue  | -0.1254  | -0.1515  | 0.8806   |

|                           |                 |          |         |          |
|---------------------------|-----------------|----------|---------|----------|
| <b>Bacteriodota</b>       | <b>T</b>        | -0.6863  | -1.6024 | 0.1196   |
|                           | <b>V</b>        | -0.5868  | -1.3702 | 0.1808   |
|                           | <b>Tissue</b>   | -1.1376  | -2.6560 | 0.0125*  |
|                           | <b>T:Tissue</b> | 1.3503   | 2.2293  | 0.0334*  |
|                           | <b>V:Tissue</b> | 0.8009   | 1.3223  | 0.1961   |
| <b>Actinobacteriodota</b> | <b>T</b>        | 0.9275   | 1.4807  | 0.1491   |
|                           | <b>V</b>        | 1.1322   | 1.8074  | 0.0807   |
|                           | <b>Tissue</b>   | -0.1082  | -0.1727 | 0.8641   |
|                           | <b>T:Tissue</b> | -0.4394  | -0.4960 | 0.6235   |
|                           | <b>V:Tissue</b> | -0.00934 | -0.0106 | 0.9916   |
| <b>Patescibacteria</b>    | <b>T</b>        | -0.3000  | -0.7347 | 0.4682   |
|                           | <b>V</b>        | -0.1288  | -0.3154 | 0.7546   |
|                           | <b>Tissue</b>   | -1.3554  | -3.3187 | 0.0024** |
|                           | <b>T:Tissue</b> | 1.0038   | 1.7380  | 0.0925   |
|                           | <b>V:Tissue</b> | 1.1476   | 1.9870  | 0.0561   |
| <b>Cyanobacteria</b>      | <b>T</b>        | -0.2093  | -0.3823 | 0.7049   |
|                           | <b>V</b>        | -0.6889  | -1.2583 | 0.2180   |
|                           | <b>Tissue</b>   | 0.0310   | 0.0567  | 0.9552   |
|                           | <b>T:Tissue</b> | 0.4441   | 0.5736  | 0.5706   |
|                           | <b>V:Tissue</b> | 0.6917   | 0.8933  | 0.3788   |

|                          |                 |         |         |         |
|--------------------------|-----------------|---------|---------|---------|
| <b>Chloroflexi</b>       | <b>T</b>        | 1.3997  | 2.3120  | 0.0278* |
|                          | <b>V</b>        | 1.4584  | 2.4090  | 0.0223* |
|                          | <b>Tissue</b>   | -0.2620 | -0.4327 | 0.6683  |
|                          | <b>T:Tissue</b> | -0.5142 | -0.6006 | 0.5526  |
|                          | <b>V:Tissue</b> | 0.5039  | 0.5886  | 0.5606  |
| <b>Acidobacteriota</b>   | <b>T</b>        | 0.7118  | 1.6764  | 0.1041  |
|                          | <b>V</b>        | 0.4095  | 0.9644  | 0.3426  |
|                          | <b>Tissue</b>   | -0.3187 | -0.7506 | 0.4588  |
|                          | <b>T:Tissue</b> | -0.1961 | -0.3265 | 0.7463  |
|                          | <b>V:Tissue</b> | 0.5812  | 0.9678  | 0.3409  |
| <b>Desulfobacterota</b>  | <b>T</b>        | -1.8671 | -2.1760 | 0.0376* |
|                          | <b>V</b>        | -1.2113 | -1.4117 | 0.1683  |
|                          | <b>Tissue</b>   | -0.7233 | -0.8430 | 0.4059  |
|                          | <b>T:Tissue</b> | 1.5669  | 1.2913  | 0.2065  |
|                          | <b>V:Tissue</b> | 0.8394  | 0.6918  | 0.4944  |
| <b>Verrucomicrobiota</b> | <b>T</b>        | 0.6828  | 1.5577  | 0.1298  |
|                          | <b>V</b>        | 0.1598  | 0.3645  | 0.7180  |
|                          | <b>Tissue</b>   | 0.2996  | 0.6834  | 0.4996  |
|                          | <b>T:Tissue</b> | -0.8861 | -1.4293 | 0.1632  |
|                          | <b>V:Tissue</b> | 0.2446  | 0.3946  | 0.6959  |

|                      |                 |         |         |         |
|----------------------|-----------------|---------|---------|---------|
| <b>Spirochaetota</b> | <b>T</b>        | -2.6292 | -1.9535 | 0.0605  |
|                      | <b>V</b>        | -2.2934 | -1.7871 | 0.0844  |
|                      | <b>Tissue</b>   | -0.7758 | -0.6046 | 0.5502  |
|                      | <b>T:Tissue</b> | 2.0217  | 1.0872  | 0.2859  |
|                      | <b>V:Tissue</b> | 1.6256  | 0.8957  | 0.3778  |
| <b>Myxococcota</b>   | <b>T</b>        | -0.1071 | -0.2890 | 0.7745  |
|                      | <b>V</b>        | 0.0187  | 0.0505  | 0.9601  |
|                      | <b>Tissue</b>   | -0.5107 | -1.3788 | 0.1782  |
|                      | <b>T:Tissue</b> | 0.2580  | 0.4925  | 0.6260  |
|                      | <b>V:Tissue</b> | 0.9135  | 1.7439  | 0.0914  |
| <b>Deinococcota</b>  | <b>T</b>        | 3.0060  | 2.5041  | 0.0184* |
|                      | <b>V</b>        | 1.9287  | 1.6067  | 0.1194  |
|                      | <b>Tissue</b>   | -0.3802 | -0.2833 | 0.7790  |
|                      | <b>T:Tissue</b> | -0.9996 | -0.5551 | 0.5832  |
|                      | <b>V:Tissue</b> | -0.2672 | -0.1484 | 0.8831  |
| <b>unclassified</b>  | <b>T</b>        | 0.2277  | 0.3041  | 0.7632  |
|                      | <b>V</b>        | 1.2283  | 1.6407  | 0.1113  |
|                      | <b>Tissue</b>   | -0.1354 | -0.1808 | 0.8577  |
|                      | <b>T:Tissue</b> | 0.5912  | 0.5584  | 0.5807  |
|                      | <b>V:Tissue</b> | 0.2046  | 0.1933  | 0.8481  |

|                                   |                 |         |         |         |
|-----------------------------------|-----------------|---------|---------|---------|
| <b>Dependentiae</b>               | <b>T</b>        | 2.1545  | 2.1523  | 0.0395* |
|                                   | <b>V</b>        | 1.7280  | 1.7262  | 0.0946  |
|                                   | <b>Tissue</b>   | 0.1788  | 0.1786  | 0.8594  |
|                                   | <b>T:Tissue</b> | -0.4661 | -0.3293 | 0.7443  |
|                                   | <b>V:Tissue</b> | -0.3266 | -0.2307 | 0.8191  |
| <b>Bdellovibrionota</b>           | <b>T</b>        | 0.4189  | 0.8886  | 0.3813  |
|                                   | <b>V</b>        | 0.0918  | 0.1947  | 0.8470  |
|                                   | <b>Tissue</b>   | -0.8517 | -1.8066 | 0.0809  |
|                                   | <b>T:Tissue</b> | 0.1674  | 0.2511  | 0.8034  |
|                                   | <b>V:Tissue</b> | 0.7196  | 1.0793  | 0.2891  |
| <b>SAR324_cladeMarine_group_B</b> | <b>T</b>        | 1.7097  | 2.3011  | 0.0285* |
|                                   | <b>V</b>        | 2.0746  | 2.7921  | 0.0090  |
|                                   | <b>Tissue</b>   | 0.4196  | 0.5648  | 0.5764  |
|                                   | <b>T:Tissue</b> | -1.0463 | -0.9958 | 0.3273  |
|                                   | <b>V:Tissue</b> | -0.7231 | -0.6882 | 0.4966  |
| <b>Planctomycetota</b>            | <b>T</b>        | 0.3800  | 0.7346  | 0.4683  |
|                                   | <b>V</b>        | 0.7824  | 1.5125  | 0.1409  |
|                                   | <b>Tissue</b>   | 0.4830  | 0.9337  | 0.3579  |
|                                   | <b>T:Tissue</b> | -0.8417 | -1.1506 | 0.2590  |
|                                   | <b>V:Tissue</b> | -0.1406 | -0.1922 | 0.8489  |

|                   |                 |         |         |        |
|-------------------|-----------------|---------|---------|--------|
| <b>p__Sva0485</b> | <b>T</b>        | -0.4639 | -0.2602 | 0.7988 |
|                   | <b>V</b>        | -0.9524 | -0.5973 | 0.5606 |
|                   | <b>Tissue</b>   | -1.3395 | -0.5601 | 0.5850 |
|                   | <b>T:Tissue</b> | 0.4703  | 0.1669  | 0.8700 |
|                   | <b>V:Tissue</b> | 1.1228  | 0.4066  | 0.6909 |
| <b>others</b>     | <b>T</b>        | 0.5321  | 1.2844  | 0.2088 |
|                   | <b>V</b>        | 0.2953  | 0.7129  | 0.4814 |
|                   | <b>Tissue</b>   | -0.3054 | -0.7375 | 0.4666 |
|                   | <b>T:Tissue</b> | 0.2267  | 0.3870  | 0.7015 |
|                   | <b>V:Tissue</b> | 0.4622  | 0.7890  | 0.4363 |
